# Supplementary material for: Influence of Lens Fluorescence on Fluorescence Lifetime Imaging Ophthalmoscopy (FLIO) Fundus Imaging and Strategies for Its Compensation
Source: PubMed Central journal article supplement — Transl Vis Sci Technol. 2020 Jul 9;9(8):13. doi: 10.1167/tvst.9.8.13 (PMC7422756; doi:10.1167/tvst.9.8.13), 2020-07-09
Supplement: tvst-9-8-13_s001.pdf [file tvst-9-8-13_s001.pdf]

Supplemental material

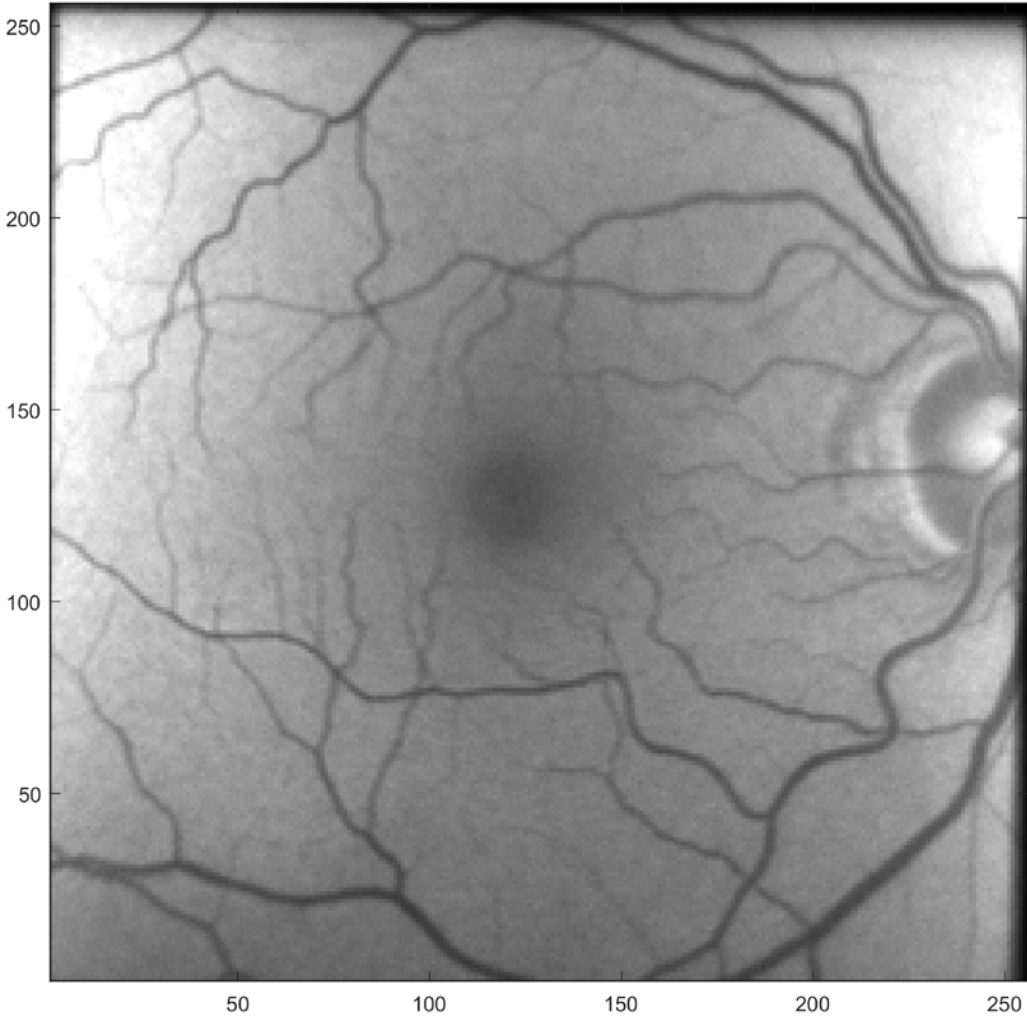

Figure S1: The preoperative fluorescence intensity image in SSC, patient shown in fig. 2.

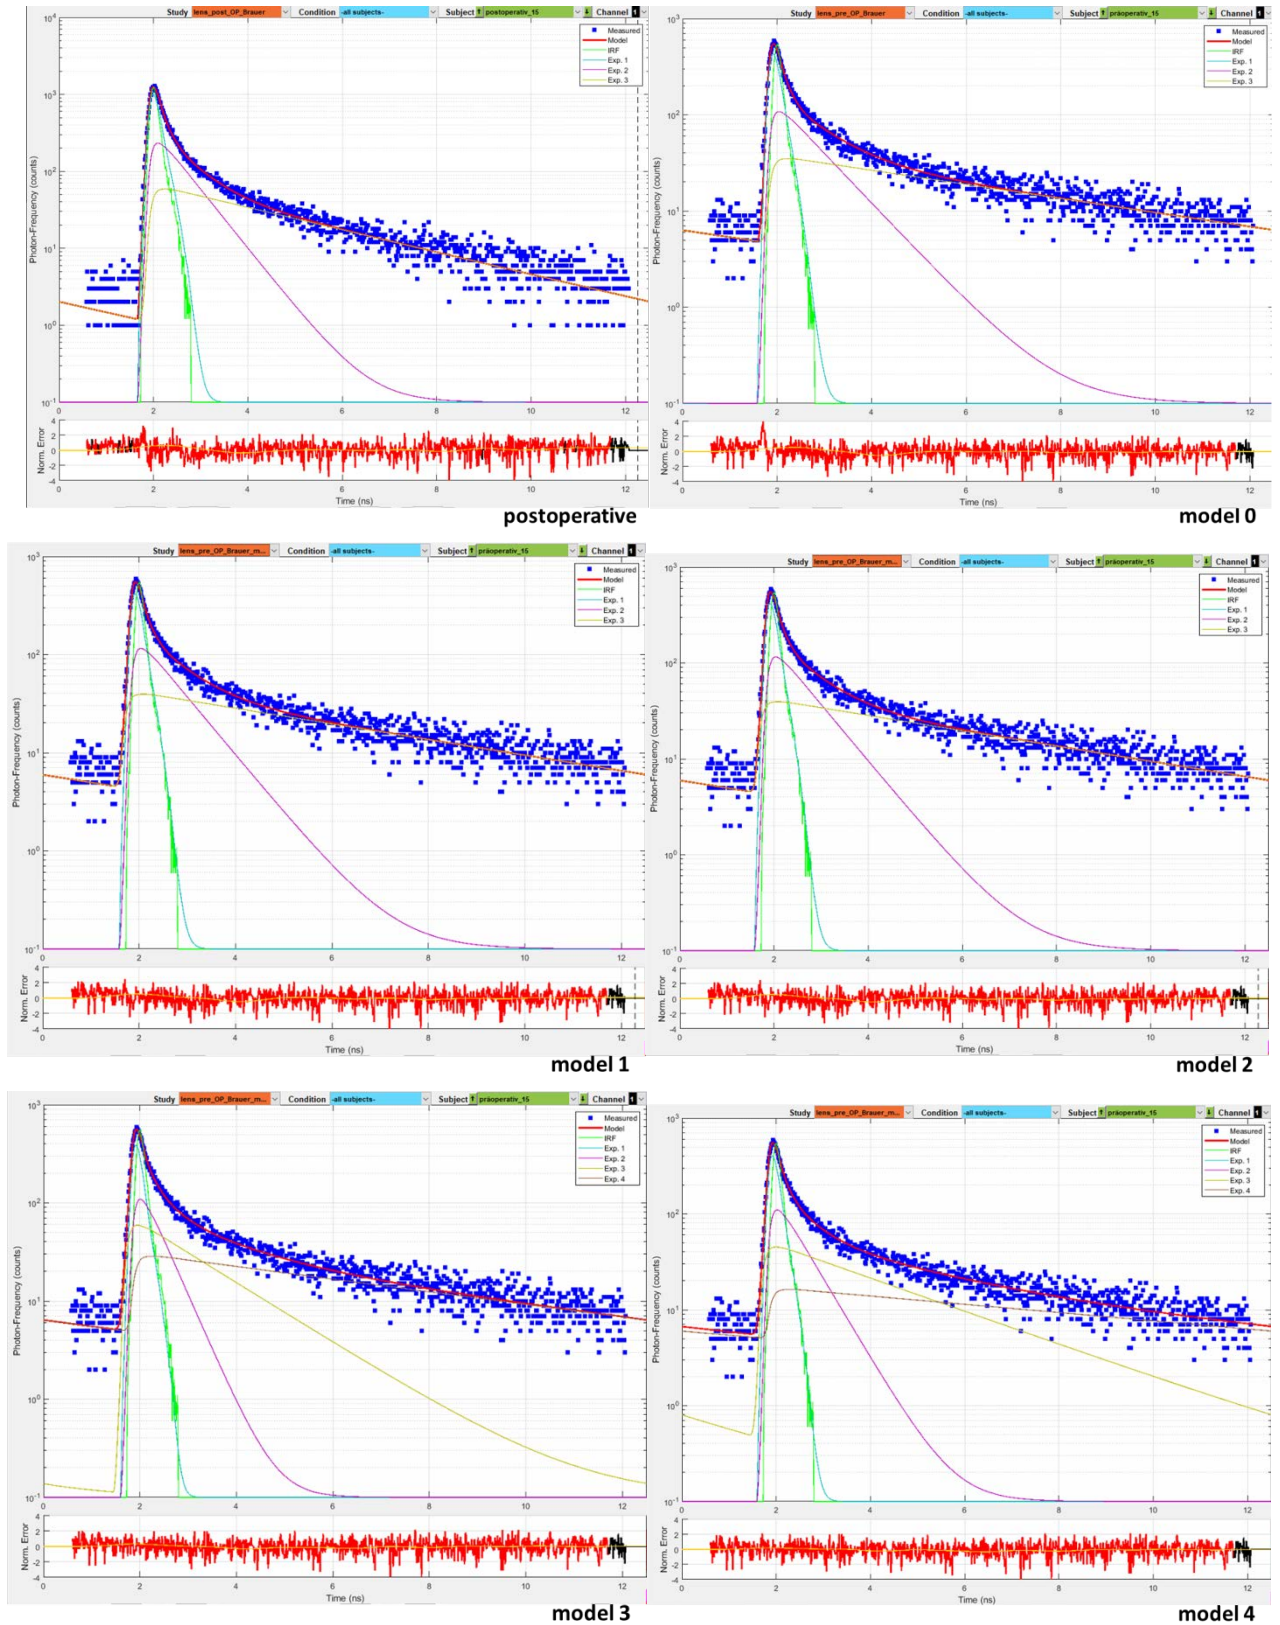

Figure S2: Fluorescence decay at one selected pixel (coordinates  $x=100, y=100$ ) of the subject shown in fig. 2 in short-wavelength spectral channel (blue squares) along with fit results (red line). The residuals of the fit are shown in the bottom of each panel (Norm. Error). From top left to bottom right: postoperative measurement and preoperative fits by models 0 through 4.

| $\tau_1$ SSC  | central    | inner ring | outer ring | Full circle |
|---------------|------------|------------|------------|-------------|
| postoperative | 56(9)      | 79(10)     | 92(9)      | 88(8)       |
| model 0       | 75(21)     | 117(26)    | 138(30)    | 132(29)     |
| model 1       | 71(16)     | 102(18)    | 120(20)    | 115(19)     |
| model 2       | 66(19)     | 92(26)     | 109(29)    | 204(28)     |
| model 3       | 52(15)     | 75(20)     | 89(21)     | 85(20)      |
| model 4       | 70(17)     | 99(19)     | 116(21)    | 111(20)     |
| $\tau_1$ LSC  |            |            |            |             |
| postoperative | 56(12)     | 72(18)     | 86(20)     | 82(19)      |
| model 0       | 75(21)     | 101(16)    | 119(20)    | 114(19)     |
| model 1       | 72(16)     | 102(14)    | 120(14)    | 115(13)     |
| model 2       | 37(16)     | 52(24)     | 63(28)     | 60(27)      |
| model 3       | 66(22)     | 85(27)     | 95(29)     | 92(28)      |
| model 4       | 66(20)     | 87(21)     | 99(22)     | 96(21)      |
| $\tau_2$ SSC  |            |            |            |             |
| postoperative | 608(94)    | 552(50)    | 561(50)    | 560(49)     |
| model 0       | 899(212)   | 912(215)   | 955(241)   | 944(233)    |
| model 1       | 817(161)   | 805(161)   | 832(180)   | 826(175)    |
| model 2       | 481(211)   | 430(193)   | 482(189)   | 471(185)    |
| model 3       | 319(94)    | 367(89)    | 419(100)   | 405(94)     |
| model 4       | 553(129)   | 598(100)   | 648(111)   | 634(107)    |
| $\tau_2$ LSC  |            |            |            |             |
| postoperative | 475(56)    | 473(56)    | 492(65)    | 487(62)     |
| model 0       | 607(74)    | 646(88)    | 679(105)   | 670(100)    |
| model 1       | 610(58)    | 681(61)    | 739(67)    | 722(64)     |
| model 2       | 258(89)    | 272(72)    | 306(100)   | 297(88)     |
| model 3       | 472(148)   | 522(123)   | 554(106)   | 545(110)    |
| model 4       | 496(118)   | 543(105)   | 574(91)    | 565(94)     |
| $\tau_3$ SSC  |            |            |            |             |
| postoperative | 3339(503)  | 2905(156)  | 1922(193)  | 2930(178)   |
| model 0       | 5583(499)  | 5413(559)  | 5475(619)  | 5464(601)   |
| model 1       | 5333(389)  | 5116(423)  | 5165(471)  | 5158(456)   |
| model 2       | 1453(696)  | 1393(615)  | 1505(627)  | 1479(616)   |
| model 3       | 1123(280)  | 1242(259)  | 1317(350)  | 1295(324)   |
| model 4       | 2813(349)  | 2791(376)  | 2782(403)  | 2844(372)   |
| $\tau_3$ LSC  |            |            |            |             |
| postoperative | 2234(241)  | 2201(171)  | 2206(186)  | 2206(188)   |
| model 0       | 3986(502)  | 3728(608)  | 3658(641)  | 3683(626)   |
| model 1       | 4039(315)  | 3932(328)  | 4027(343)  | 4006(336)   |
| model 2       | 946(122)   | 1052(141)  | 1188(186)  | 1151(160)   |
| model 3       | 1308(366)  | 1515(309)  | 1623(321)  | 1590(305)   |
| model 4       | 1941(284)  | 1920(349)  | 1876(380)  | 1982(317)   |
| $\tau_4$ SSC  |            |            |            |             |
| model 2       | 5461(399)  | 5247(412)  | 5339(408)  | 5322(404)   |
| model 3       | 5684(549)  | 5552(464)  | 5600(401)  | 5592(415)   |
| model 4       | 8328(1568) | 7592(1167) | 7314(875)  | 7404(946)   |
| $\tau_4$ LSC  |            |            |            |             |
| model 2       | 4311(271)  | 4446(377)  | 4890(572)  | 4775(513)   |
| model 3       | 4288(616)  | 4027(783)  | 3912(810)  | 3948(795)   |
| model 4       | 5144(1375) | 4476(1305) | 4229(1209) | 4309(1226)  |

Table S1: mean Values (standard deviation) of lifetime components  $\tau_1$  through  $\tau_4$  in ps for the patient cohort from the postoperative three-exponential fit (model 0) and preoperative fits according to models 0 to 4 in the center, inner and outer ring as well as full circle of the ETDRS-grid.

| $a_1$ SSC     | central   | inner ring | outer ring | Full circle |
|---------------|-----------|------------|------------|-------------|
| postoperative | 93.6(2.3) | 88.2(2.0)  | 86.6(1.8)  | 87.2(1.8)   |

|                         |             |             |             |             |
|-------------------------|-------------|-------------|-------------|-------------|
| model 0                 | 86.1(6.9)   | 82.3(6.4)   | 82.8(5.0)   | 82.8(5.3)   |
| model 1                 | 86.1(6.6)   | 82.2(5.7)   | 82.3(4.6)   | 82.4(4.8)   |
| model 2                 | 80.8(10.9)  | 72.9(9.6)   | 74.2(7.1)   | 74.1(7.5)   |
| model 3                 | 84.8(7.5)   | 79.0(6.1)   | 78.5(4.9)   | 78.8(5.2)   |
| model 4                 | 85.1(7.5)   | 81.3(6.6)   | 81.6(5.2)   | 81.6(5.5)   |
| <b>a<sub>1</sub>LSC</b> |             |             |             |             |
| postoperative           | 85.1(3.1)   | 79.3(2.3)   | 77.9(2.5)   | 78.4(2.3)   |
| model 0                 | 82.6(4.1)   | 79.6(2.8)   | 79.9(2.3)   | 79.9(2.3)   |
| model 1                 | 82.5(4.4)   | 80.3(3.7)   | 81.3(2.8)   | 81.1(3.0)   |
| model 2                 | 73.3(7.7)   | 67.3(7.7)   | 67.9(5.9)   | 67.9(6.2)   |
| model 3                 | 81.5(6.4)   | 79.0(4.9)   | 79.1(3.5)   | 79.2(3.9)   |
| model 4                 | 81.8(5.3)   | 78.6(4.8)   | 78.7(4.0)   | 78.8(4.1)   |
| <b>a<sub>2</sub>SSC</b> |             |             |             |             |
| postoperative           | 5.54(2.17)  | 10.22(1.89) | 11.83(1.69) | 11.30(1.68) |
| model 0                 | 8.88(3.66)  | 12.27(3.52) | 12.39(2.54) | 12.27(2.71) |
| model 1                 | 8.58(3.24)  | 12.08(2.42) | 12.57(1.93) | 12.35(2.03) |
| model 2                 | 11.24(5.32) | 17.02(5.27) | 16.52(4.93) | 16.48(4.75) |
| model 3                 | 4.82(2.80)  | 9.39(3.01)  | 10.83(3.11) | 10.34(2.99) |
| model 4                 | 7.55(2.60)  | 10.89(1.78) | 11.43(1.47) | 11.21(1.46) |
| <b>a<sub>2</sub>LSC</b> |             |             |             |             |
| postoperative           | 13.18(2.76) | 18.38(2.03) | 19.72(2.15) | 19.23(1.99) |
| model 0                 | 14.27(2.93) | 17.55(1.87) | 17.56(1.76) | 17.47(1.71) |
| model 1                 | 14.37(2.82) | 16.91(2.20) | 16.48(1.87) | 16.52(1.91) |
| model 2                 | 19.49(5.22) | 24.48(5.07) | 24.76(4.00) | 24.55(4.18) |
| model 3                 | 12.14(3.48) | 16.37(2.69) | 17.10(2.20) | 16.79(2.29) |
| model 4                 | 13.74(3.04) | 17.38(2.41) | 17.79(2.21) | 17.60(2.20) |
| <b>a<sub>3</sub>SSC</b> |             |             |             |             |
| postoperative           | 0.83(0.27)  | 1.57(0.31)  | 1.56(0.30)  | 1.54(0.29)  |
| model 0                 | 4.99(3.48)  | 5.38(3.45)  | 4.81(2.95)  | 4.94(3.07)  |
| model 1                 | 5.33(3.60)  | 5.73(3.48)  | 5.10(2.94)  | 5.25(3.07)  |
| model 2                 | 3.00(3.54)  | 4.87(3.60)  | 4.73(2.88)  | 4.71(3.00)  |
| model 3                 | 6.52(4.49)  | 7.40(4.40)  | 6.86(3.75)  | 9.97(3.88)  |
| model 4                 | 4.88(3.48)  | 5.14(3.15)  | 4.43(2.51)  | 4.60(2.66)  |
| <b>a<sub>3</sub>LSC</b> |             |             |             |             |
| postoperative           | 1.69(0.41)  | 2.30(0.42)  | 2.38(0.41)  | 2.34(0.40)  |
| model 0                 | 3.07(1.78)  | 2.81(1.36)  | 2.53(0.94)  | 2.61(1.04)  |
| model 1                 | 3.14(2.12)  | 2.74(1.74)  | 2.25(1.17)  | 2.38(1.31)  |
| model 2                 | 4.75(1.81)  | 6.25(2.08)  | 5.94(1.98)  | 5.98(1.80)  |
| model 3                 | 3.80(4.57)  | 2.45(3.20)  | 1.78(2.19)  | 1.98(2.46)  |
| model 4                 | 2.76(2.86)  | 2.14(2.65)  | 1.65(2.10)  | 1.79(2.23)  |
| <b>a<sub>4</sub>SSC</b> |             |             |             |             |
| model 2                 | 5.20(3.70)  | 5.53(3.56)  | 4.82(2.88)  | 4.99(3.04)  |
| model 3                 | 3.92(2.70)  | 4.26(2.85)  | 3.87(2.64)  | 3.96(2.67)  |
| model 4                 | 2.44(2.52)  | 2.69(2.65)  | 2.58(2.48)  | 2.60(2.52)  |
| <b>a<sub>4</sub>LSC</b> |             |             |             |             |
| model 2                 | 2.47(2.32)  | 2.00(2.05)  | 1.45(1.31)  | 1.60(1.50)  |
| model 3                 | 2.54(1.63)  | 2.20(1.12)  | 1.98(0.79)  | 2.04(0.86)  |
| model 4                 | 1.75(0.75)  | 1.88(0.72)  | 1.85(0.67)  | 1.85(0.66)  |

Table S2: mean Values (standard deviation) of the relative amplitudes of a<sub>1</sub> through a<sub>4</sub> of the respective lifetimes in percent for the patient cohort from the postoperative three-exponential fit (model 0) and preoperative fits according to models 0 to 4 in the center, inner and outer ring as well as full circle of the ETDRS-grid.
